# Supplementary material for: Are Faecal Microbiota Analyses on Species-Level Suitable Clinical Biomarkers? A Pilot Study in Subjects with Morbid Obesity
Source: PubMed Central journal article supplement (PMC8005088; doi:10.3390/microorganisms9030664), 2021-03-23
Supplement: microorganisms-09-00664-s001.pdf [file microorganisms-09-00664-s001.pdf]

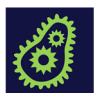

**Supplementary table S1:** The 104 species targeted by PMP™ panels. The PMP™ qPCR probes are specific for the commercially available DMSZ and ATCC bacteria species genomes listed, and standard curves are made for each reference genome to enable quantification of the bacteria species.

| Organism                                 | BIO-ME assay number | Reference DNA             | Standard curve coefficients |             |
|------------------------------------------|---------------------|---------------------------|-----------------------------|-------------|
|                                          |                     |                           | <i>a</i>                    | <i>b</i>    |
| <i>Acidaminococcus intestini</i>         | 001                 | DSMZ 21505                | -1.05061048                 | 30.97420279 |
| <i>Akkermansia muciniphila</i>           | 002                 | DSMZ 22959                | -0.99200069                 | 27.99878359 |
| <i>Alistipes finegoldii</i>              | 003                 | DSMZ 17242                | -0.98701559                 | 30.05656981 |
| <i>Alistipes onderdonkii</i>             | 004                 | DSMZ 19147                | -1.04163499                 | 30.7075846  |
| <i>Alistipes putredinis</i>              | 005                 | DSMZ 17216                | -1.09219549                 | 31.50681812 |
| <i>Alistipes shahii</i>                  | 006                 | DSMZ 19121                | -1.05918421                 | 30.26379342 |
| <i>Anaerobutyricum hallii</i>            | 007                 | DSMZ 3353                 | -0.94450275                 | 30.52602934 |
| <i>Anaerostipes hadrus</i>               | 008                 | DSMZ 3319                 | -0.9929078                  | 30.08062728 |
| <i>Bacteroides caccae</i>                | 009                 | DSMZ 19024                | -0.94871781                 | 29.78049382 |
| <i>Bacteroides cellulosilyticus</i>      | 010                 | DSMZ 14838                | -1.01554703                 | 30.26067387 |
| <i>Bacteroides coprocola</i>             | 011                 | DSMZ 17136                | -1.03990522                 | 30.12786534 |
| <i>Bacteroides dorei</i>                 | 012                 | DSMZ 17855                | -0.915311                   | 28.32832543 |
| <i>Bacteroides eggerthii</i>             | 013                 | DSMZ 20697                | -0.97839003                 | 28.12306779 |
| <i>Bacteroides finegoldii</i>            | 014                 | DSMZ 17565                | -0.95839557                 | 29.34717734 |
| <i>Bacteroides fragilis</i>              | 015                 | DSMZ 2151                 | -1.04885914                 | 30.02264856 |
| <i>Bacteroides intestinalis</i>          | 016                 | DSMZ 17393                | -1.01698864                 | 29.74175488 |
| <i>Bacteroides massiliensis</i>          | 017                 | DSMZ 17679                | -0.98004837                 | 28.272182   |
| <i>Bacteroides nordii</i>                | 018                 | DSMZ 18764                | -1.09923573                 | 30.93153838 |
| <i>Bacteroides ovatus</i>                | 019                 | DSMZ 1896                 | -1.02943587                 | 30.55452496 |
| <i>Bacteroides plebeius</i>              | 020                 | DSMZ 17135                | -1.0586166                  | 30.28596137 |
| <i>Bacteroides pyogenes</i>              | 021                 | DSMZ 20611                | -1.27181603                 | 33.48445974 |
| <i>Bacteroides stercorisoris</i>         | 022                 | DSMZ 26884                | -0.96905696                 | 28.56165362 |
| <i>Bacteroides stercoris</i>             | 023                 | DSMZ 19555                | -1.04436195                 | 30.52559276 |
| <i>Bacteroides thetaiotaomicron</i>      | 024                 | DSMZ 2079                 | -0.99588526                 | 29.97868842 |
| <i>Bacteroides vulgatus</i>              | 025                 | DSMZ 1447                 | -0.99375166                 | 30.04611268 |
| <i>Bacteroides xylanisolvens</i>         | 026                 | DSMZ 18836                | -1.04977123                 | 30.2109513  |
| <i>Barnesiella intestinihominis</i>      | 027                 | DSMZ 21032                | -0.99423239                 | 29.2892562  |
| <i>Bifidobacterium adolescentis</i>      | 028                 | DSMZ 20083                | -1.01681283                 | 27.59507437 |
| <i>Bifidobacterium angulatum</i>         | 029                 | DSMZ 20098                | -0.97819653                 | 29.71230634 |
| <i>Bifidobacterium bifidum</i>           | 030                 | DSMZ 20456                | -0.96510907                 | 30.14128241 |
| <i>Bifidobacterium catenulatum</i>       | 031                 | DSMZ 16992                | -0.96028633                 | 28.05646253 |
| <i>Bifidobacterium longum</i>            | 032                 | DSMZ 20088,<br>DSMZ 20219 | -0.97281345                 | 28.90702869 |
| <i>Bifidobacterium pseudocatenulatum</i> | 033                 | DSMZ 20438                | -0.99173488                 | 26.5329584  |
| <i>Bilophila wadsworthia</i>             | 034                 | DSMZ 11045                | -1.01117429                 | 29.55859266 |
| <i>Blautia hydrogenotrophica</i>         | 035                 | DSMZ 10507                | -1.00971335                 | 30.8131316  |
| <i>Blautia wexlerae</i>                  | 036                 | DSMZ 19850                | -1.11039423                 | 30.59460761 |
| <i>Butyrivibrio crossotus</i>            | 037                 | DSMZ 2876                 | -1.03971266                 | 31.01461527 |
| <i>Christensenella minuta</i>            | 038                 | DSMZ 22607                | -0.91593106                 | 26.26144741 |
| <i>Citrobacter koseri</i>                | 039                 | DSMZ 4595                 | -1.10189398                 | 31.33504815 |

|                                       |     |             |             |             |
|---------------------------------------|-----|-------------|-------------|-------------|
| <i>Clostridium bolteae</i>            | 040 | DSMZ 15670  | -1.00074079 | 29.47113956 |
| <i>Clostridium butyricum</i>          | 041 | DSMZ 10702  | -1.06325494 | 30.86244565 |
| <i>Clostridium citroniae</i>          | 042 | DSMZ 19261  | -1.03889555 | 30.32929622 |
| <i>Clostridium leptum</i>             | 043 | DSMZ 753    | -0.97427548 | 26.94196736 |
| <i>Clostridium nexile</i>             | 044 | DSMZ 1787   | -1.07268777 | 30.80280579 |
| <i>Clostridium scindens</i>           | 045 | DSMZ 5676   | -0.99249464 | 27.84473891 |
| <i>Clostridium symbiosum</i>          | 046 | DSMZ 934    | -1.0426042  | 30.29530036 |
| <i>Collinsella aerofaciens</i>        | 047 | DSMZ 3979   | -0.99547011 | 29.80091144 |
| <i>Collinsella intestinalis</i>       | 048 | DSMZ 13280  | -1.09303418 | 30.50259202 |
| <i>Coprococcus catus</i>              | 049 | ATCC 27761  | -1.08774726 | 31.09799167 |
| <i>Coprococcus comes</i>              | 050 | ATCC 27758  | -0.97342159 | 28.83727187 |
| <i>Desulfovibrio piger</i>            | 051 | DSMZ 749    | -1.06973085 | 30.06719604 |
| <i>Dorea formicigenerans</i>          | 052 | DSMZ 3992   | -0.99322225 | 29.6728366  |
| <i>Dorea longicatena</i>              | 053 | DSMZ 13814  | -1.00182917 | 30.09620124 |
| <i>Eggerthella lenta</i>              | 054 | DSMZ 2243   | -1.06605138 | 30.99166682 |
| <i>Eisenbergiella massiliensis</i>    | 055 | DSMZ 101499 | -1.04924994 | 30.17645471 |
| <i>Eisenbergiella tayi</i>            | 056 | DSMZ 26961  | -1.08357349 | 29.91507109 |
| <i>Enterococcus dispar</i>            | 057 | DSMZ 6630   | -1.07038602 | 30.14395012 |
| <i>Enterococcus faecalis</i>          | 058 | DSMZ 20478  | -1.13299593 | 31.09974288 |
| <i>Enterococcus faecium</i>           | 059 | DSMZ 20477  | -1.06061417 | 30.69427997 |
| <i>Enterococcus hirae</i>             | 060 | DSMZ 20160  | -1.08260705 | 31.15199318 |
| <i>Erysipelatoclostridium ramosum</i> | 061 | DSMZ 1402   | -1.03375451 | 30.21368043 |
| <i>Escherichia coli</i>               | 062 | DSMZ 30083  | -0.97357413 | 29.26532652 |
| <i>Eubacterium eligens</i>            | 063 | DSMZ 3376   | -0.98195148 | 30.41186476 |
| <i>Eubacterium rectale</i>            | 064 | DSMZ 17629  | -0.99768899 | 27.90880377 |
| <i>Eubacterium siraeum</i>            | 065 | DSMZ 15702  | -0.99046026 | 29.86540549 |
| <i>Eubacterium ventriosum</i>         | 066 | DSMZ 3988   | -0.94953202 | 29.78624085 |
| <i>Faecalibacterium prausnitzii</i>   | 067 | DSMZ 17677  | -0.99727617 | 30.26448204 |
| <i>Fusobacterium varium</i>           | 068 | DSMZ 19868  | -1.02620668 | 31.05126535 |
| <i>Haemophilus parainfluenzae</i>     | 069 | DSMZ 8978   | -1.05366826 | 29.73433083 |
| <i>Hafnia alvei</i>                   | 070 | DSMZ 30163  | -1.06905313 | 30.0326339  |
| <i>Klebsiella variicola</i>           | 071 | DSMZ 15968  | -0.96734124 | 29.58339885 |
| <i>Lactobacillus acidophilus</i>      | 072 | DSMZ 20079  | -1.01748389 | 30.54203154 |
| <i>Lactobacillus animalis</i>         | 073 | DSMZ 20602  | -1.06402298 | 30.18071147 |
| <i>Lactobacillus brevis</i>           | 074 | DSMZ 20054  | -1.07579118 | 31.07036533 |
| <i>Lactobacillus jensenii</i>         | 075 | DSMZ 20557  | -1.01853873 | 30.25214011 |
| <i>Lactobacillus paracasei</i>        | 076 | DSMZ 5622   | -1.02335    | 31.48621617 |
| <i>Lactobacillus rhamnosus</i>        | 077 | DSMZ 20021  | -1.09411101 | 30.21476944 |
| <i>Lactobacillus ruminis</i>          | 078 | DSMZ 20403  | -0.98212992 | 29.68251303 |
| <i>Lactobacillus salivarius</i>       | 079 | DSMZ 20555  | -1.03981024 | 29.71281834 |
| <i>Methanobrevibacter smithii</i>     | 080 | DSMZ 861    | -1.02710283 | 29.23576913 |
| <i>Morganella morganii</i>            | 081 | DSMZ 30164  | -1.06757616 | 29.66653129 |
| <i>Mycoplasma hominis</i>             | 082 | DSMZ 25592  | -1.05382172 | 31.24076181 |
| <i>Odoribacter splanchnicus</i>       | 083 | DSMZ 20712  | -1.06846044 | 30.45616819 |
| <i>Parabacteroides distasonis</i>     | 084 | DSMZ 20701  | -0.98009259 | 28.75145783 |
| <i>Parabacteroides goldsteinii</i>    | 085 | DSMZ 19448  | -1.05714489 | 30.39481878 |
| <i>Parabacteroides gordonii</i>       | 086 | DSMZ 23371  | -0.98096663 | 29.21102888 |

|                                   |     |             |             |             |
|-----------------------------------|-----|-------------|-------------|-------------|
| <i>Parabacteroides merdae</i>     | 087 | DSMZ 19495  | -0.99997555 | 29.050045   |
| <i>Paraprevotella clara</i>       | 088 | DSMZ 19731  | -1.03703379 | 30.52026965 |
| <i>Prevotella copri</i>           | 089 | DSMZ 18205  | -0.98140764 | 28.8991566  |
| <i>Prevotella stercorea</i>       | 090 | DSMZ 18206  | -1.12538489 | 31.84220512 |
| <i>Proteus mirabilis</i>          | 091 | DSMZ 4479   | -1.05650952 | 31.0140791  |
| <i>Roseburia hominis</i>          | 092 | DSMZ 16839  | -1.02223434 | 30.31886566 |
| <i>Roseburia intestinalis</i>     | 093 | DSMZ 14610  | -1.04161979 | 27.450061   |
| <i>Roseburia inulinivorans</i>    | 094 | DSMZ 16841  | -1.05804935 | 30.1451495  |
| <i>Ruminococcus albus</i>         | 095 | DSMZ 20455  | -1.14233963 | 30.23344    |
| <i>Ruminococcus bromii</i>        | 096 | ATCC 27255  | -1.00316784 | 29.49455476 |
| <i>Ruminococcus gnavus</i>        | 097 | DSMZ 108212 | -1.00381811 | 29.66311384 |
| <i>Ruminococcus torques</i>       | 098 | ATCC 27756  | -1.05778764 | 31.54960136 |
| <i>Streptococcus sanguinis</i>    | 099 | DSMZ 20567  | -1.02869686 | 28.80567265 |
| <i>Streptococcus thermophilus</i> | 100 | DSMZ 20617  | -0.97681106 | 29.89745222 |
| <i>Subdoligranulum variabile</i>  | 101 | DSMZ 15176  | -0.98936484 | 29.29031483 |
| <i>Sutterella wadsworthensis</i>  | 102 | DSMZ 14016  | -0.9647432  | 28.73388786 |
| <i>Turicibacter sanguinis</i>     | 103 | DSMZ 14220  | -0.98675327 | 30.71085981 |
| <i>Veillonella atypica</i>        | 104 | DSMZ 20739  | -1.02831246 | 30.39838561 |
